# Supplementary material for: Machine Learning-Based Virtual Screening for the Identification of Cdk5 Inhibitors
Source: MDPI journal article supplement (doi:10.3390/ijms231810653), 2022-09-13
Supplement: s1 [file s1]

# Supporting Information

## Machine learning-based virtual screening for the identification of Cdk5 inhibitors

*Miriana Di Stefano<sup>a,b</sup>, Salvatore Galati<sup>a</sup>, Gabriella Ortore<sup>a</sup>, Isabella Caligiuri<sup>c</sup>, Flavio Rizzolio<sup>c,d</sup>,  
Costanza Ceni<sup>a,b</sup>, Simone Bertini<sup>a</sup>, Giulia Bononi<sup>a</sup>, Carlotta Granchi<sup>a</sup>, Marco Macchia<sup>a</sup>, Giulio Poli<sup>a,\*</sup>,  
Tiziano Tuccinardi<sup>a</sup>*

<sup>a</sup> Department of Pharmacy, University of Pisa, Via Bonanno 6, 56126 Pisa, Italy.

<sup>b</sup> Department of Life Sciences, University of Siena, Via Aldo Moro, 2, 53100 Siena, Italy.

<sup>c</sup> Pathology Unit, Centro di Riferimento Oncologico di Aviano (CRO) IRCCS, 33081 Aviano, Italy.

<sup>d</sup> Department of Molecular Sciences and Nanosystems, Ca' Foscari University, 30123 Venezia, Italy.

### Table of Contents

|                                                                                                  |    |
|--------------------------------------------------------------------------------------------------|----|
| <b>Table S1.</b> Cross validation results obtained for RF-based models.                          | S2 |
| <b>Table S2.</b> Cross validation results obtained for KNN-based models.                         | S2 |
| <b>Table S3.</b> Cross validation results obtained for SVM-based models.                         | S3 |
| <b>Table S4.</b> Cross validation results obtained for MLP-based models.                         | S3 |
| <b>Table S5.</b> Hyperparameters setup of the best performing model, used for virtual screening. | S4 |
| <b>Figure S1.</b> CDK5 IC <sub>50</sub> plots for compounds CPD1 and CPD4.                       | S4 |

**Table S1.** Evaluation results, expressed in terms of MCC, obtained for RF-based models developed through cross-validation analysis.

| Fingerprint | MCC             |
|-------------|-----------------|
| Morgan      | $0.65 \pm 0.05$ |
| Layer       | $0.63 \pm 0.05$ |
| Pattern     | $0.62 \pm 0.06$ |
| Pharm2D     | $0.60 \pm 0.05$ |
| RDKit       | $0.59 \pm 0.05$ |
| MACCS       | $0.54 \pm 0.05$ |

**Table S2.** Evaluation results, expressed in terms of MCC, obtained for KNN-based models developed through cross-validation analysis.

| Fingerprint | MCC             |
|-------------|-----------------|
| Morgan      | $0.60 \pm 0.04$ |
| RDKit       | $0.59 \pm 0.05$ |
| Layer       | $0.59 \pm 0.03$ |
| Pharm2D     | $0.54 \pm 0.06$ |
| Pattern     | $0.53 \pm 0.05$ |
| MACCS       | $0.50 \pm 0.06$ |

**Table S3.** Evaluation results, expressed in terms of MCC, obtained for SVM-based models developed through cross-validation analysis.

| Fingerprint | MCC             |
|-------------|-----------------|
| Morgan      | $0.69 \pm 0.04$ |
| Pattern     | $0.63 \pm 0.05$ |
| RDKit       | $0.60 \pm 0.08$ |
| Pharm2D     | $0.60 \pm 0.03$ |
| Layer       | $0.59 \pm 0.07$ |
| MACCS       | $0.55 \pm 0.07$ |

**Table S4.** Evaluation results, expressed in terms of MCC, obtained for MLP-based models developed through cross-validation analysis.

| Fingerprint | MCC             |
|-------------|-----------------|
| Morgan      | $0.67 \pm 0.08$ |
| Pattern     | $0.59 \pm 0.05$ |
| RDKit       | $0.58 \pm 0.11$ |
| Pharm2D     | $0.58 \pm 0.05$ |
| Layer       | $0.53 \pm 0.05$ |
| MACCS       | $0.47 \pm 0.06$ |

**Table S5.** Hyperparameters setup of the best performing model, used for virtual screening.

| Hyperparameter    | Value |
|-------------------|-------|
| Max_features      | log2  |
| n_estimators      | 500   |
| Class_weight      | None  |
| Min_samples_split | 2     |
| Min_samples_leaf  | 1     |
| Max_depth         | None  |

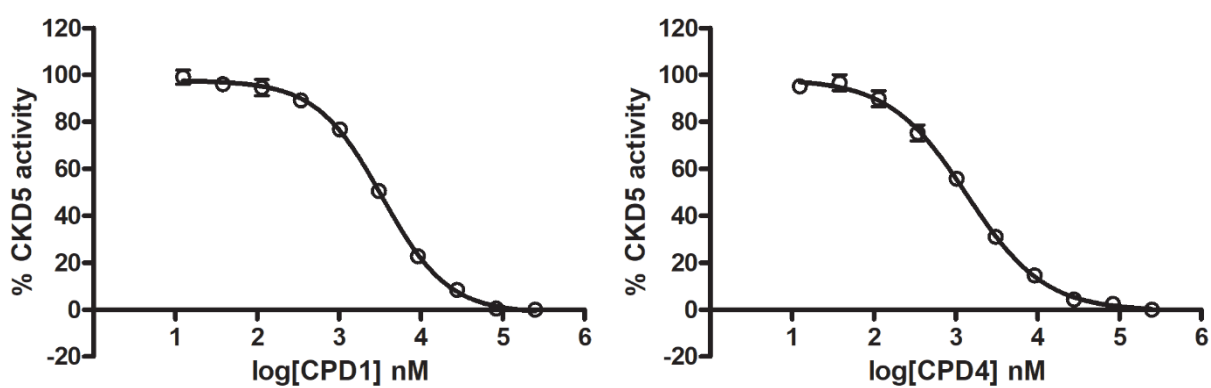

**Figure S1.** CDK5 IC<sub>50</sub> plots for compounds **CPD1** (left side) and **CPD4** (right side).
